# Supplementary material for: The Japan Statin Treatment Against Recurrent Stroke (J-STARS): A Multicenter, Randomized, Open-label, Parallel-group Study
Source: PubMed Central journal article supplement (PMC4588424; doi:10.1016/j.ebiom.2015.08.006), 2015-08-06
Supplement: mmc1.pdf [file mmc1.pdf]

Supplementary Table S1. Visit and Medication Compliances.

|                                  | Month 2    | Month 6    | Year 1     | Year 2     | Year 3     | Year 4     | Year 5     | End of follow-up |
|----------------------------------|------------|------------|------------|------------|------------|------------|------------|------------------|
| <b>Pravastatin</b>               |            |            |            |            |            |            |            |                  |
| Patients, n                      | 793        | 781        | 772        | 760        | 731        | 702        | 612        | 793              |
| Actual visits, n                 | 793        | 780        | 770        | 758        | 728        | 700        | 288        | 685              |
| 20 mg pravastatin, n (%)         | 0          | 3 (0.4)    | 1 (0.1)    | 2 (0.3)    | 2 (0.3)    | 4 (0.6)    | 0          | 3 (0.4)          |
| 15 mg pravastatin, n (%)         | 0          | 0          | 0          | 0          | 0          | 0          | 0          | 1 (0.1)          |
| 10 mg pravastatin, n (%)         | 780 (98.4) | 731 (93.7) | 702 (91.2) | 649 (85.6) | 596 (81.9) | 552 (78.9) | 219 (76.0) | 492 (71.8)       |
| 5 mg pravastatin, n (%)          | 0          | 1 (0.1)    | 2 (0.3)    | 1 (0.1)    | 1 (0.1)    | 2 (0.3)    | 0          | 2 (0.3)          |
| No pravastatin, n (%)            | 13 (1.6)   | 45 (5.8)   | 65 (8.4)   | 106 (14.0) | 129 (17.7) | 142 (20.3) | 69 (24.0)  | 187 (27.3)       |
| Other statin, n (%)              | 0          | 2 (0.3)    | 3 (0.4)    | 10 (1.3)   | 9 (1.2)    | 11 (1.6)   | 8 (2.8)    | 20 (2.9)         |
| Other lipid-lowering drug, n (%) | 0          | 4 (0.5)    | 6 (0.8)    | 8 (1.1)    | 9 (1.2)    | 9 (1.3)    | 9 (3.1)    | 18 (2.6)         |
| <b>Control</b>                   |            |            |            |            |            |            |            |                  |
| Patients, n                      | 785        | 780        | 777        | 765        | 731        | 707        | 620        | 785              |
| Actual visits, n                 | 784        | 777        | 772        | 762        | 730        | 706        | 285        | 694              |
| No lipid-lowering drug, n (%)    | 667 (85.1) | 644 (82.9) | 616 (79.8) | 557 (73.1) | 505 (69.2) | 466 (66.0) | 179 (62.8) | 423 (61.0)       |
| Pravastatin, n (%)               | 1 (0.1)    | 4 (0.5)    | 10 (1.3)   | 13 (1.7)   | 18 (2.5)   | 20 (2.8)   | 10 (3.5)   | 25 (3.6)         |
| Other statin, n (%)              | 11 (1.4)   | 19 (2.4)   | 26 (3.4)   | 34 (4.5)   | 40 (5.5)   | 52 (7.4)   | 26 (9.1)   | 53 (7.6)         |
| Other lipid-lowering drug, n (%) | 95 (12.1)  | 91 (11.7)  | 96 (12.4)  | 98 (12.9)  | 103 (14.1) | 89 (12.6)  | 31 (10.9)  | 77 (11.1)        |

Supplementary Table S2. Occurrence of each stroke subtype by the baseline stroke diagnoses.

| Baseline Stroke              | Recurred Stroke             |                    |                          |                         |
|------------------------------|-----------------------------|--------------------|--------------------------|-------------------------|
|                              | Atherothrombotic Infarction | Lacunar Infarction | Cardioembolic Infarction | Intracranial Hemorrhage |
| Atherothrombotic Infarction  | 8/15                        | 11/10              | 3/0                      | 1/3                     |
| Lacunar Infarction           | 0/10                        | 35/27              | 3/3                      | 11/7                    |
| Undetermined Etiology Stroke | 0/0                         | 1/1                | 1/0                      | 0/2                     |

Figures represent number of patients (pravastatin group/control group) who developed respective subtypes of recurred stroke.

Supplementary Table S3. Occurrence of Major Adverse Events.

| Event Name                   | Pravastatin<br>n=780 | Control<br>n=785 |
|------------------------------|----------------------|------------------|
| Any adverse event, n (%)     | 188 (24.1)           | 164 (20.9)       |
| Any cancer, n (%)            | 43 (5.5)             | 40 (5.1)         |
| Other adverse events         |                      |                  |
| Pneumonia, n (%)             | 14 (1.8)             | 11 (1.4)         |
| Fracture, n (%)              | 12 (1.5)             | 10 (1.3)         |
| Cataract, n (%)              | 9 (1.2)              | 10 (1.3)         |
| Colon polyp, n (%)           | 9 (1.2)              | 7 (0.9)          |
| Rhabdomyolysis, n (%)        | 2 (0.3)              | 1 (0.1)          |
| Laboratory examination       |                      |                  |
| AST, > 3.0 x ULN             | 8 (1.0)              | 4 (0.5)          |
| ALT, > 3.0 x ULN             | 6 (0.8)              | 2 (0.3)          |
| Creatine kinase, > 2.5 x ULN | 7 (0.9)              | 4 (0.5)          |

Adverse events occurred at the incidence of  $\geq 1.0\%$ , and those specifically related with the studied drug are listed.

ULN, upper limit of normal.

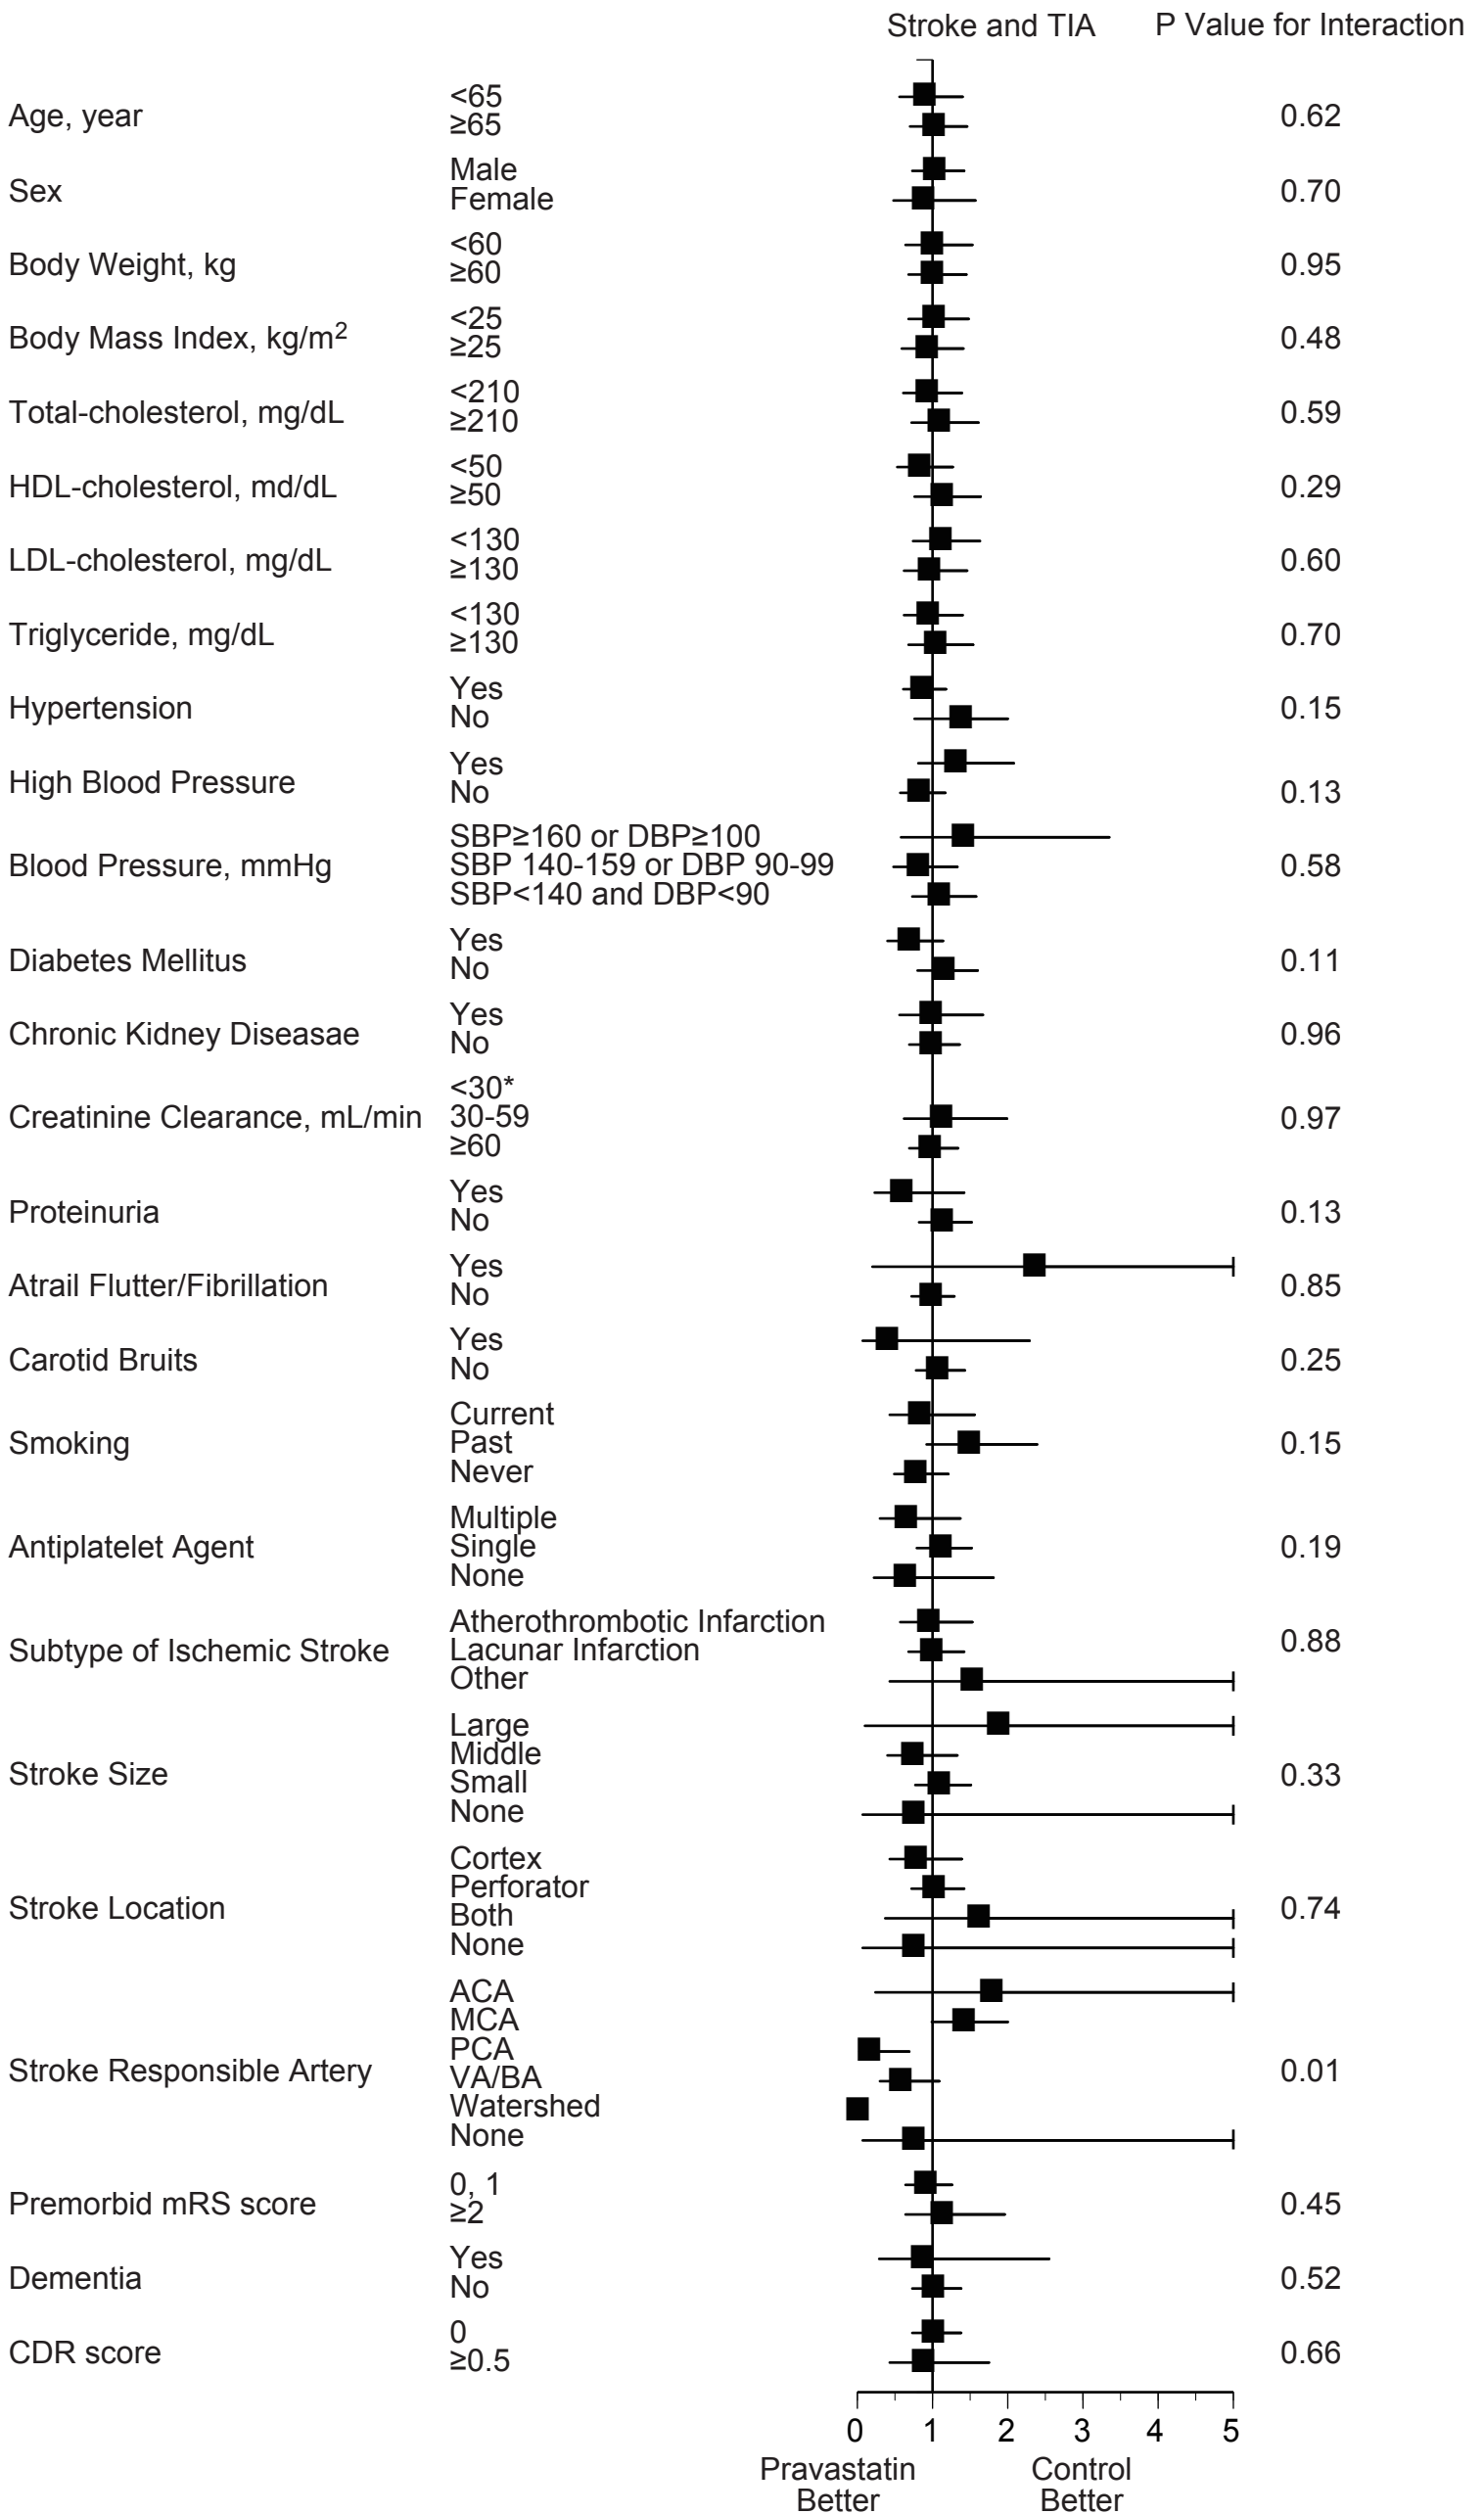

Supplementary Fig. S1. Cox proportional hazards for stroke and TIA in pre-defined subgroups. Bars represent the relative risk with a 95%CI. P values for interaction test for heterogeneity of treatment across subgroups. \*Hazard ratio was not obtained because of low number of subjects and events. TIA, transient ischemic attack. HDL, high density lipoprotein. LDL, low density lipoprotein. SBP, systolic blood pressure. DBP, diastolic blood pressure. ACA, anterior cerebral artery. MCA, middle cerebral artery. PCA, posterior cerebral artery. VA, vertebral artery. BA, basilar artery. mRS, modified Rankin scale. CDR, clinical dementia rating.

Atherothrombotic Infarction P Value for Interaction

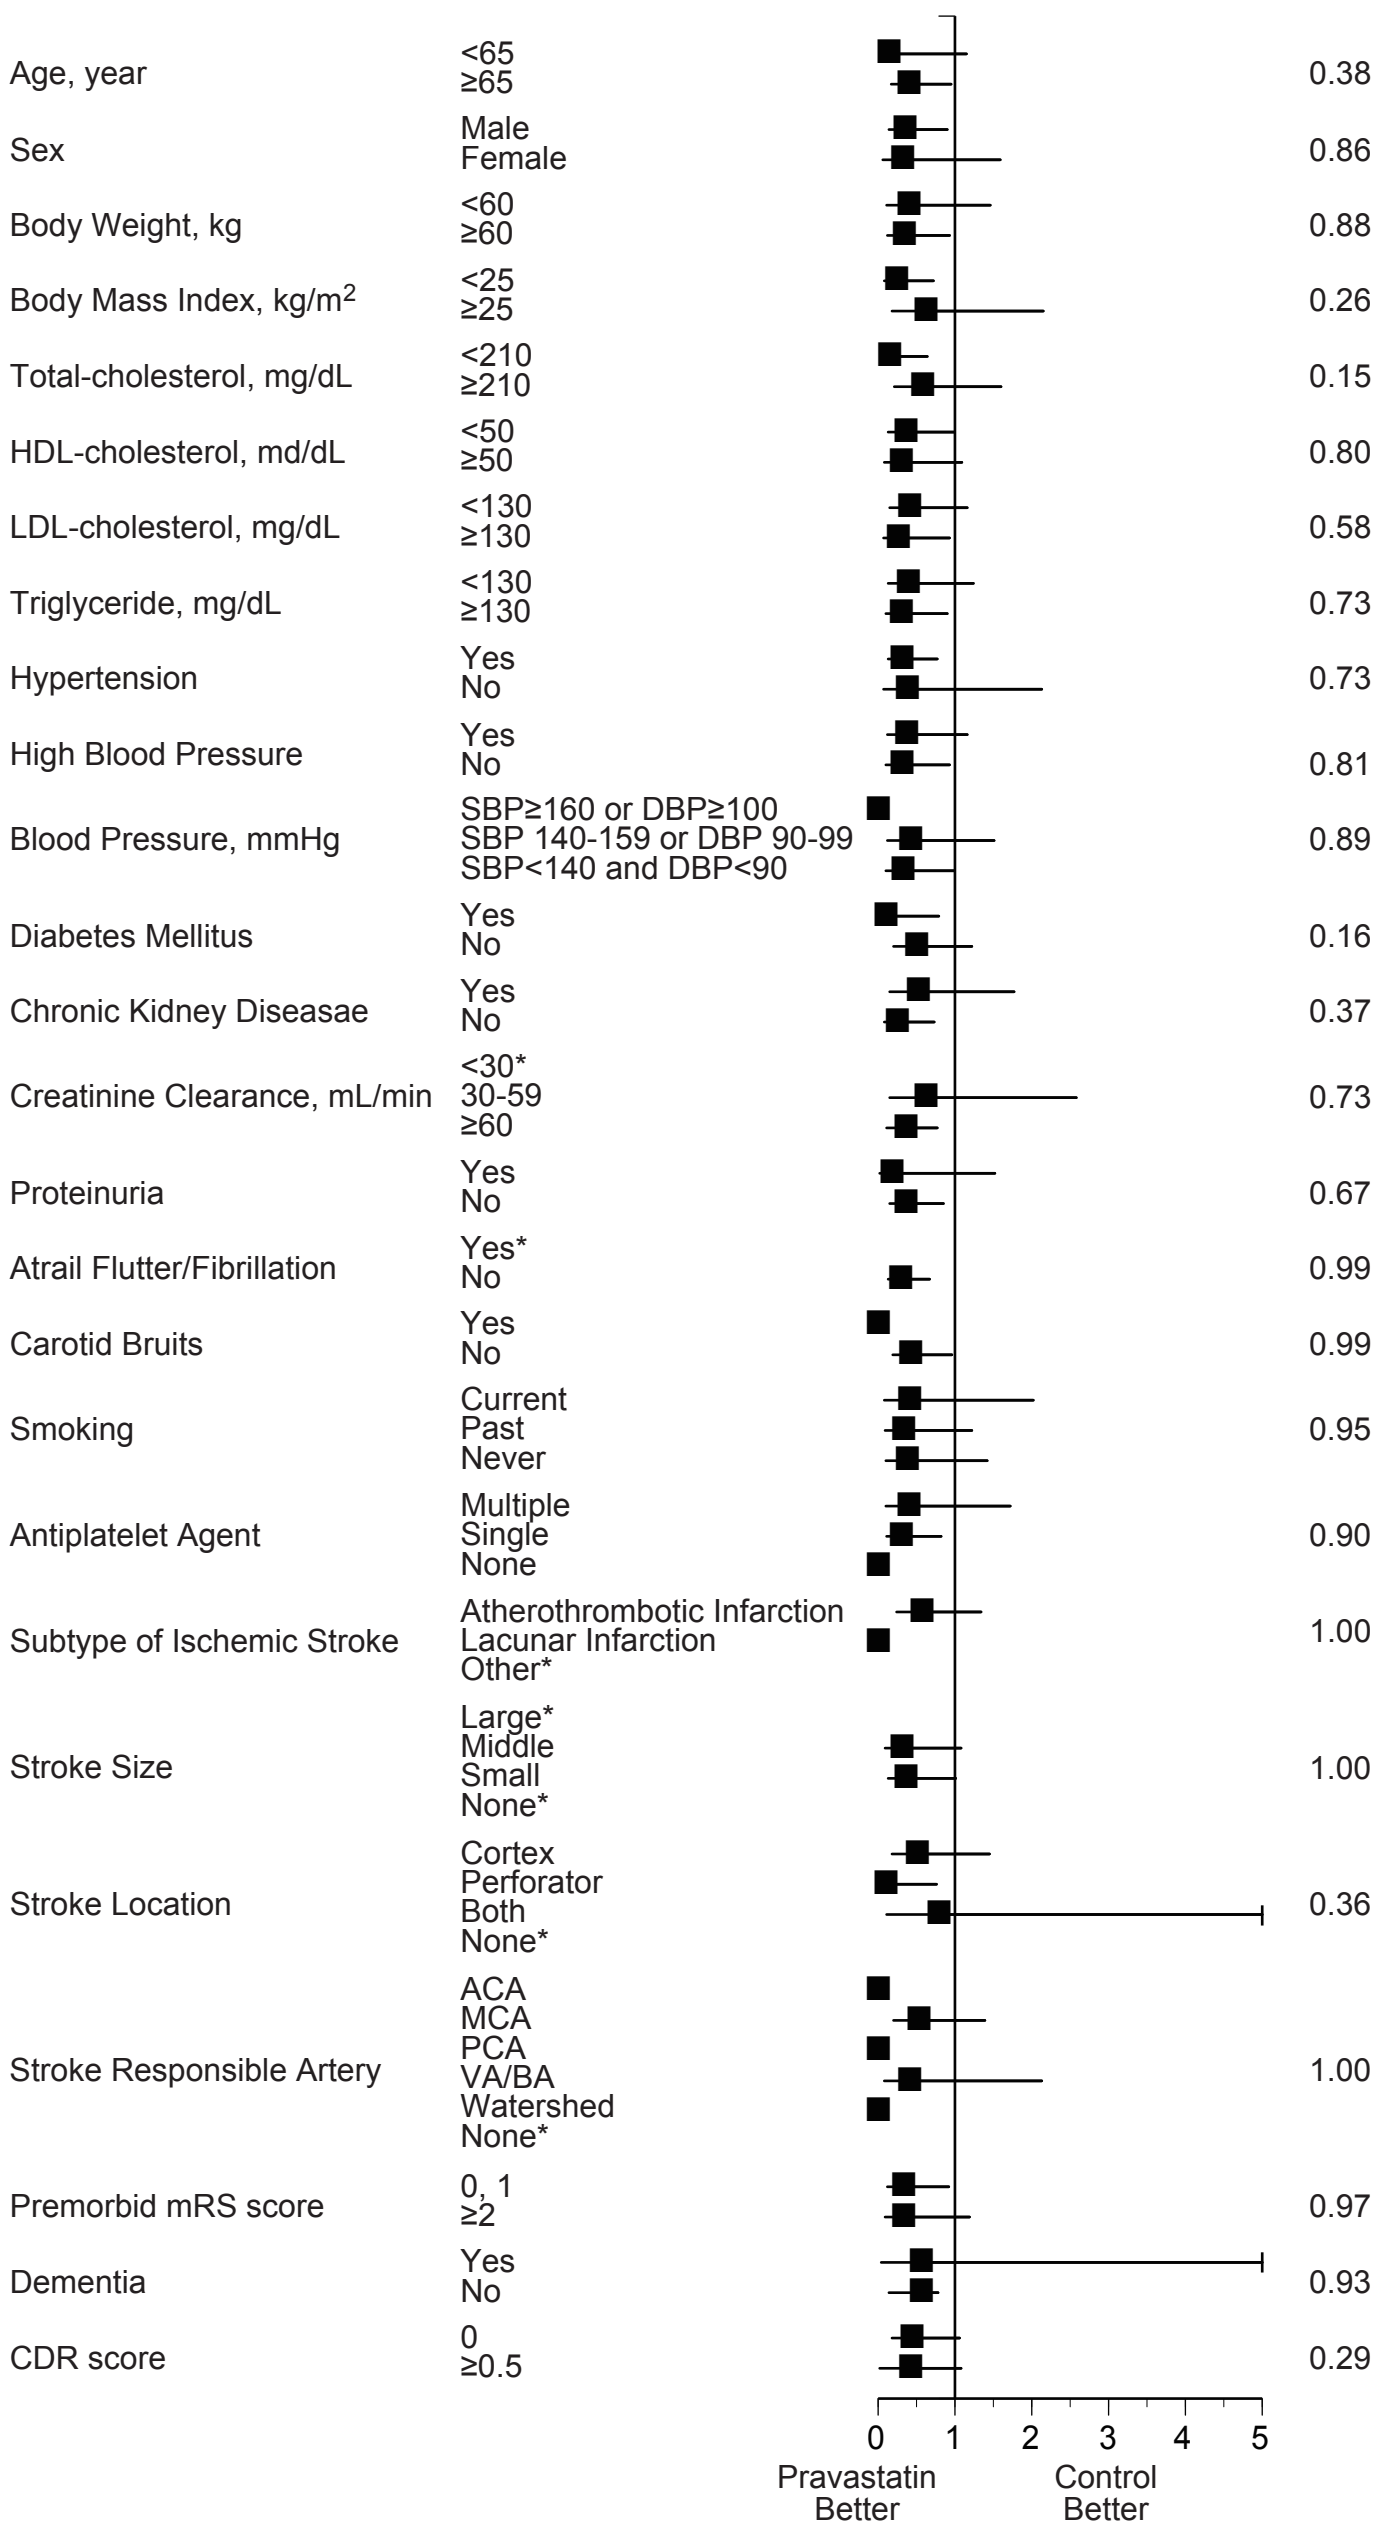

Supplementary Fig. S2. Cox proportional hazards for atherothrombotic infarction in pre-defined subgroups. Bars represent the relative risk with a 95%CI. P values for interaction test for heterogeneity of treatment across subgroups. \*Hazard ratio was not obtained because of low number of subjects and events. TIA, transient ischemic attack. HDL, high density lipoprotein. LDL, low density lipoprotein. SBP, systolic blood pressure. DBP, diastolic blood pressure. ACA, anterior cerebral artery. MCA, middle cerebral artery. PCA, posterior cerebral artery. VA, vertebral artery. BA, basilar artery. mRS, modified Rankin scale. CDR, clinical dementia rating.

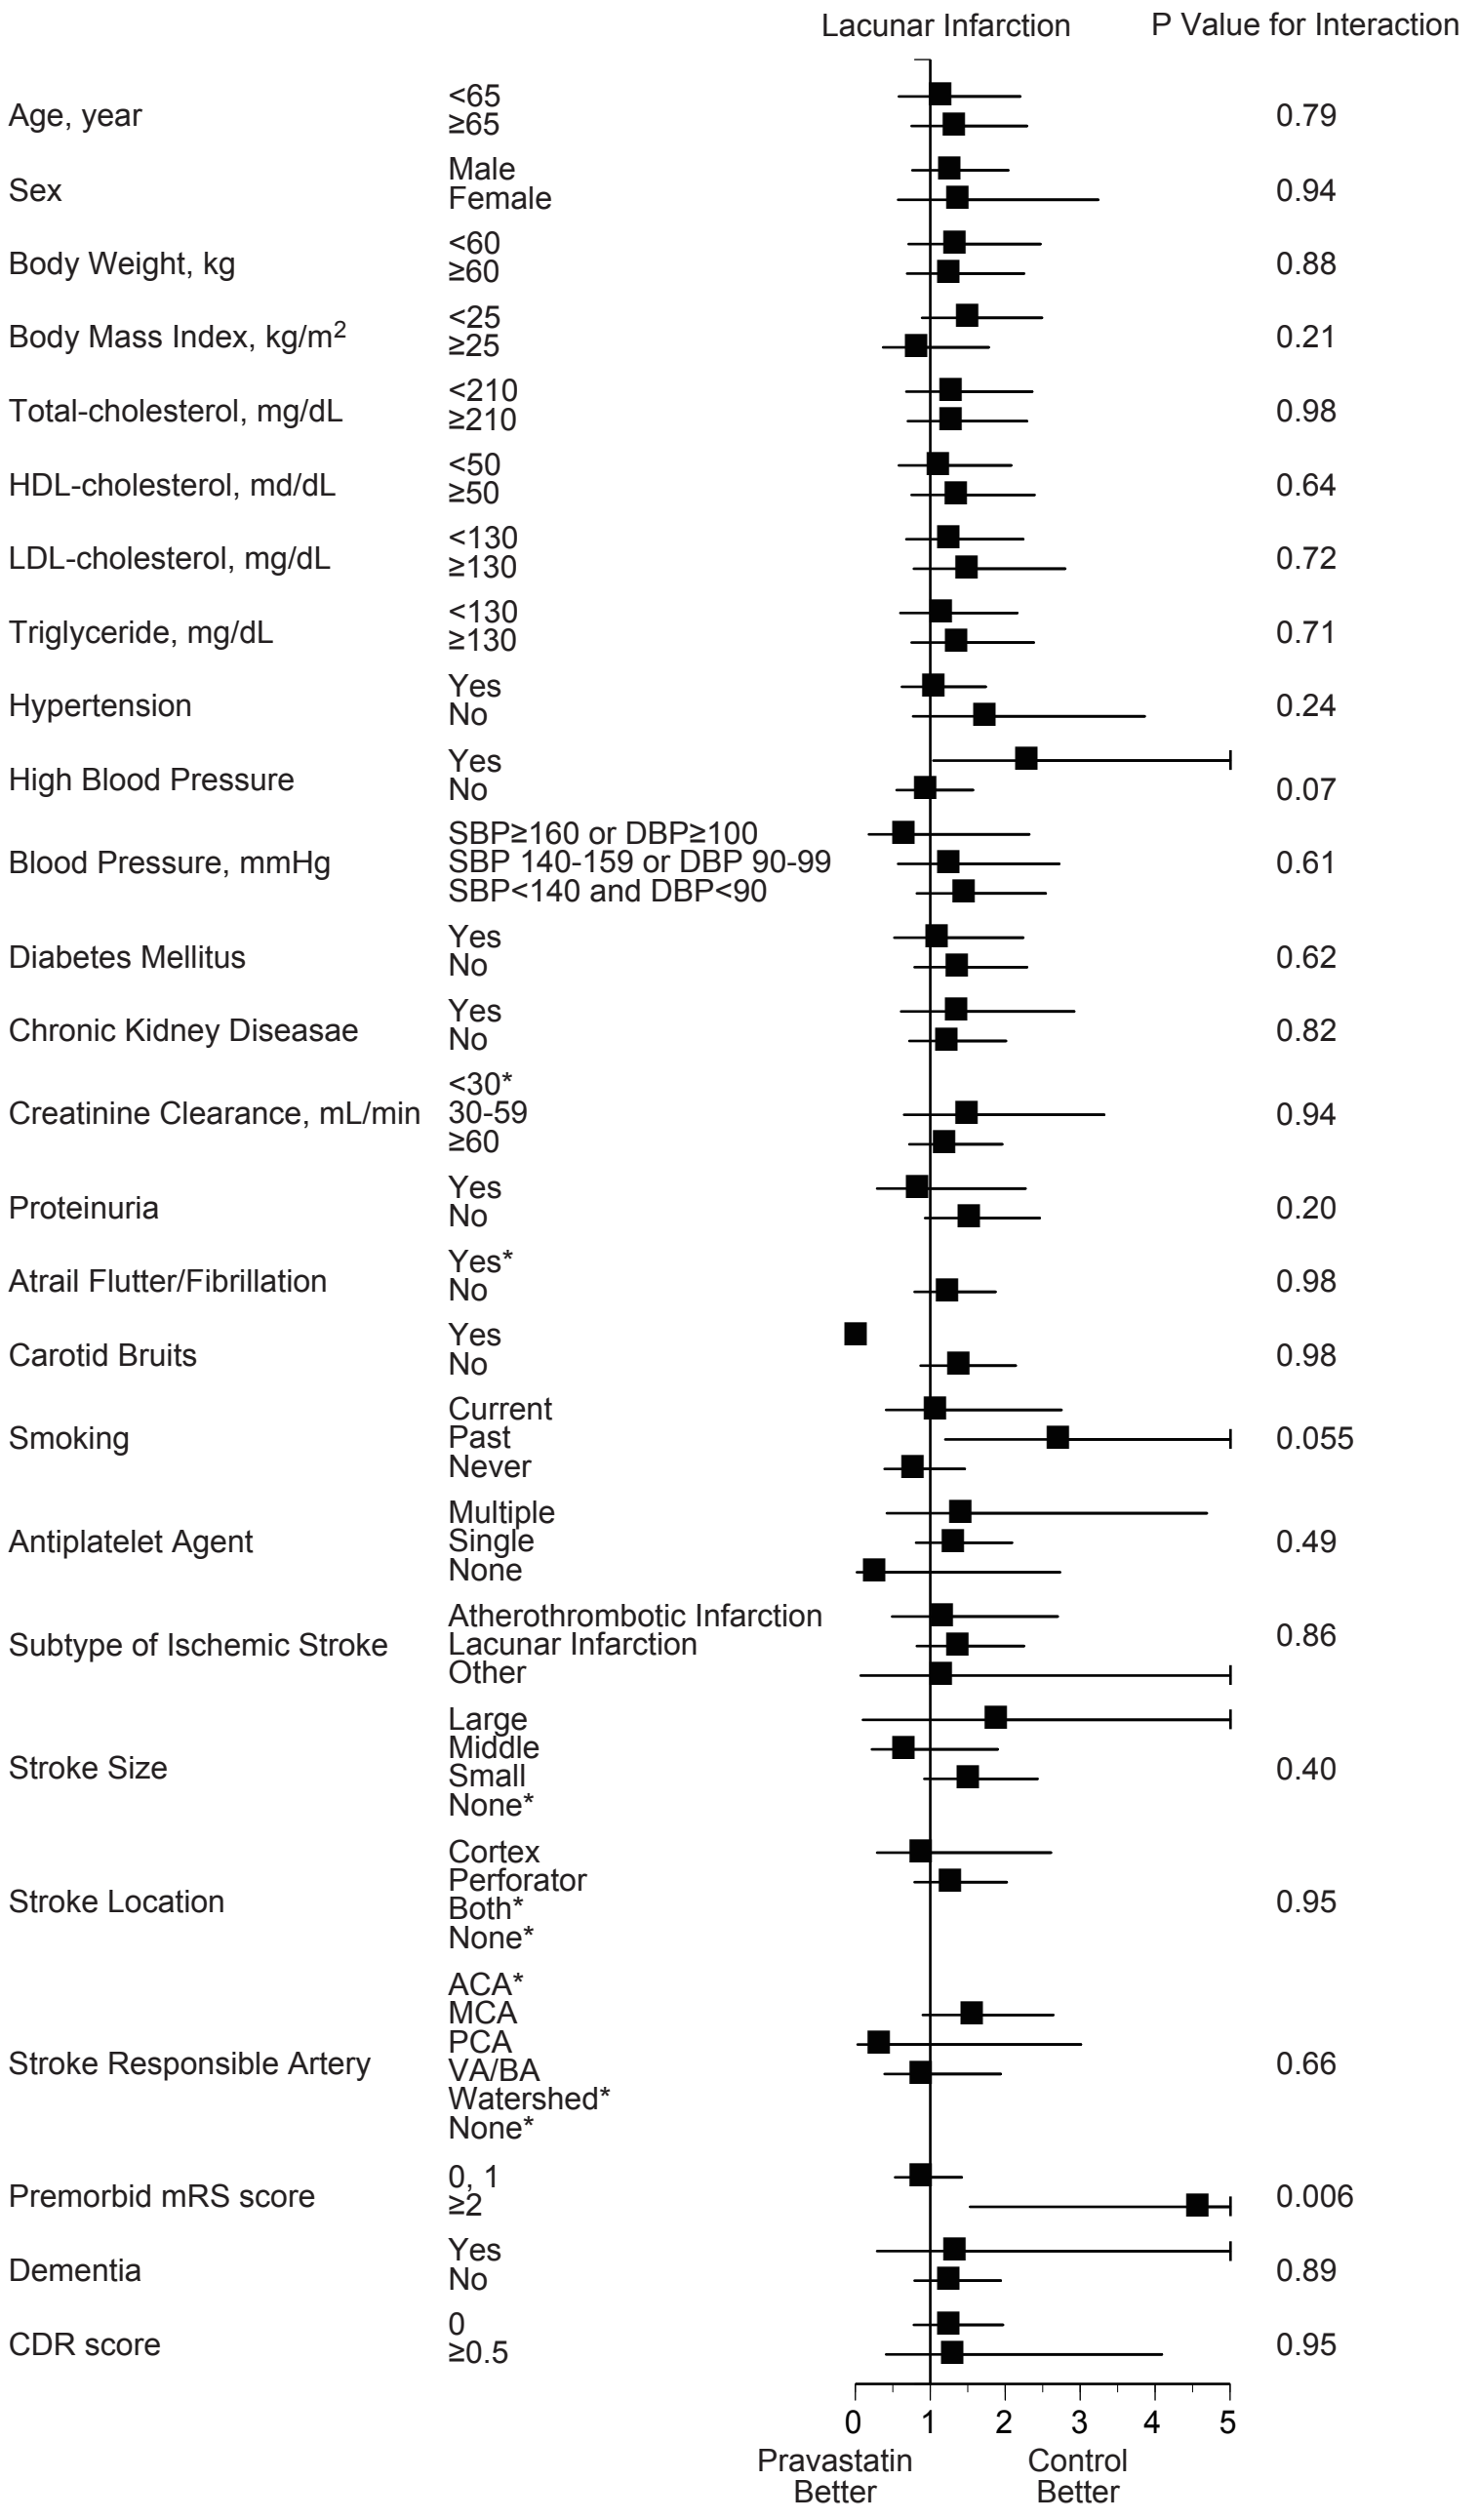

Supplementary Fig. S3. Cox proportional hazards for lacunar infarction in pre-defined subgroups. Bars represent the relative risk with a 95%CI. P values for interaction test for heterogeneity of treatment across subgroups. \*Hazard ratio was not obtained because of low number of subjects and events. TIA, transient ischemic attack. HDL, high density lipoprotein. LDL, low density lipoprotein. SBP, systolic blood pressure. DBP, diastolic blood pressure. ACA, anterior cerebral artery. MCA, middle cerebral artery. PCA, posterior cerebral artery. VA, vertebral artery. BA, basilar artery. mRS, modified Rankin scale. CDR, clinical dementia rating.

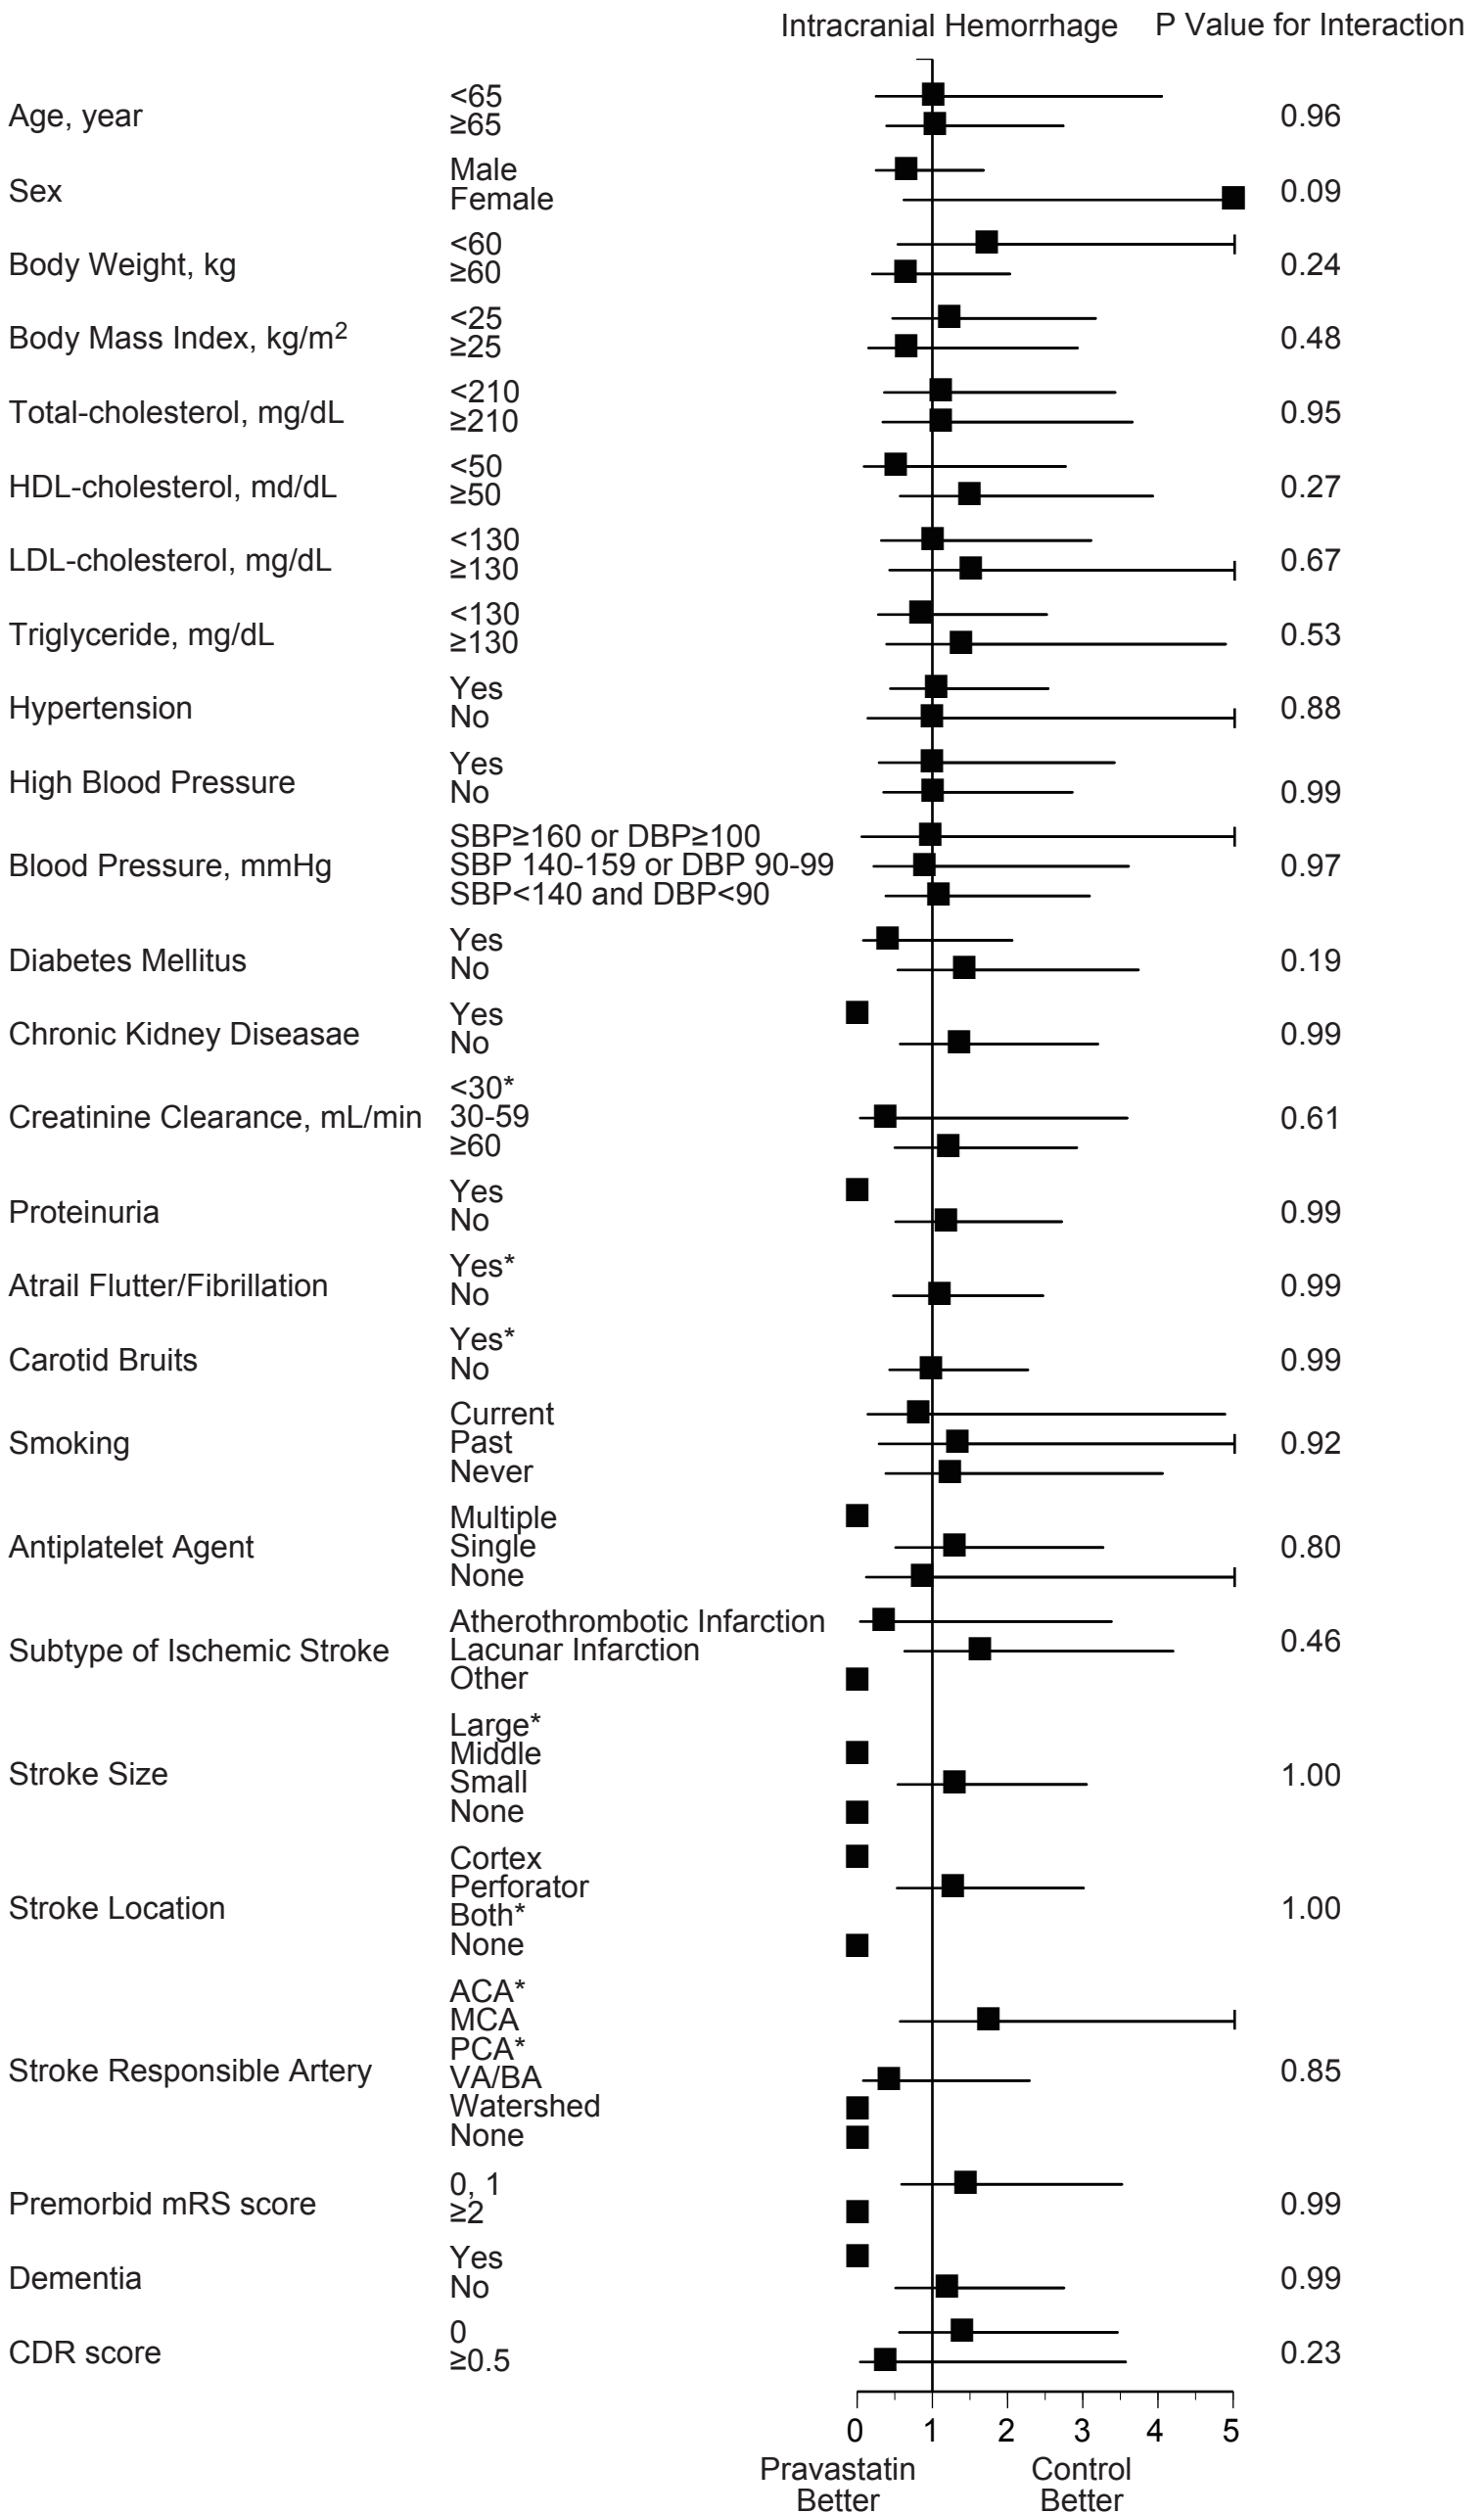

Supplementary Fig. S4. Cox proportional hazards for intracranial hemorrhage in pre-defined subgroups. Bars represent the relative risk with a 95%CI. P values for interaction test for heterogeneity of treatment across subgroups. \*Hazard ratio was not obtained because of low number of subjects and events. TIA, transient ischemic attack. HDL, high density lipoprotein. LDL, low density lipoprotein. SBP, systolic blood pressure. DBP, diastolic blood pressure. ACA, anterior cerebral artery. MCA, middle cerebral artery. PCA, posterior cerebral artery. VA, vertebral artery. BA, basilar artery. mRS, modified Rankin scale. CDR, clinical dementia rating.
